# Supplementary material
Source: Springer Nature journal article supplement (https://www.springermedizin.de/resource/supplementary/12911_2014_832_MOESM2_ESM.pdf/9526748)

Additional file 2: Figure 1

### Combined model

Random sample validation:

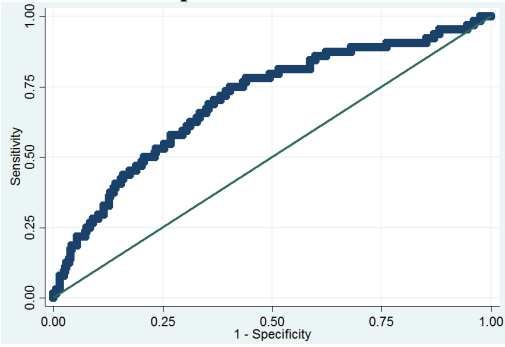

Historical validation:

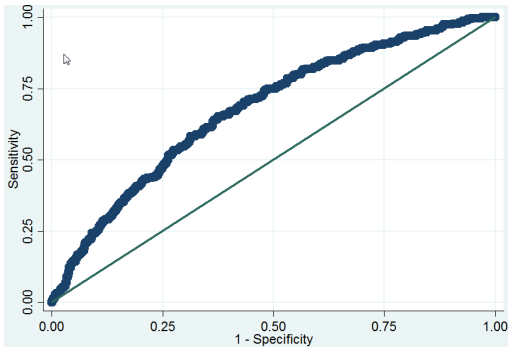

### Pneumonia model

Random sample validation:

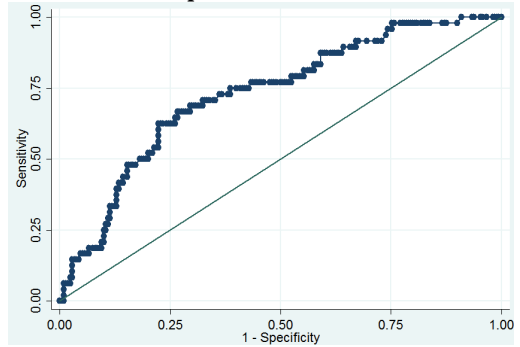

Historical validation

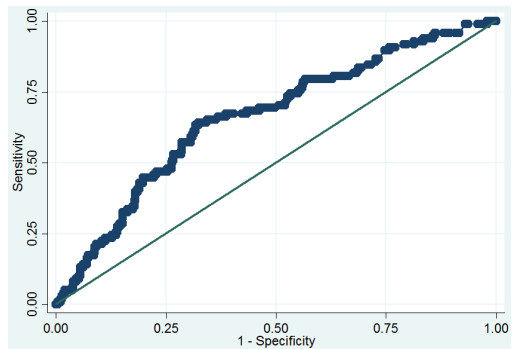

### Congestive heart failure model

Random sample validation:

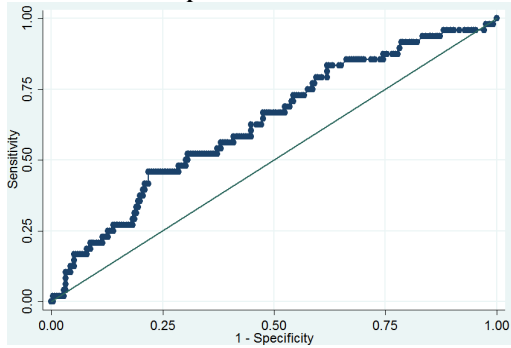

Historical validation:

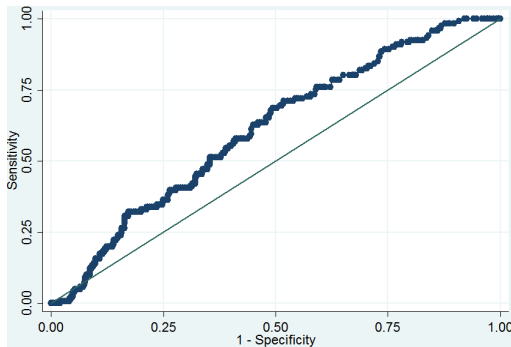

### Acute myocardial infarction model

Random sample validation:

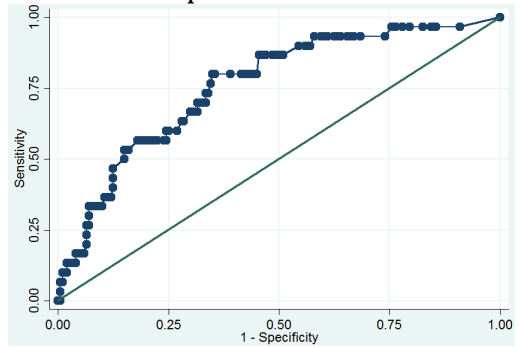

Historical validation:

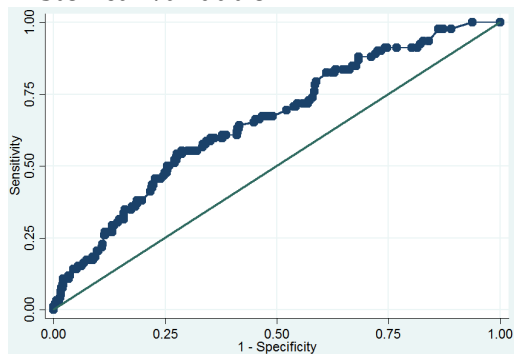

Additional file 2: Figure 2: Decile of risk versus actual readmission rate for random sample validation (A) and historical validation (B)

A:

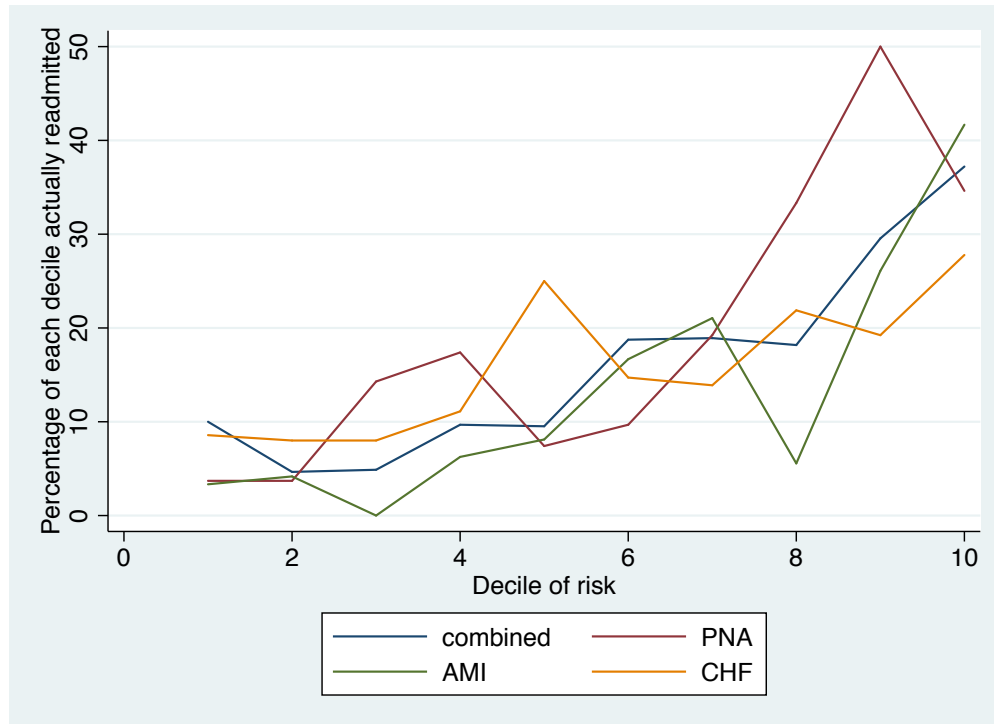

B:

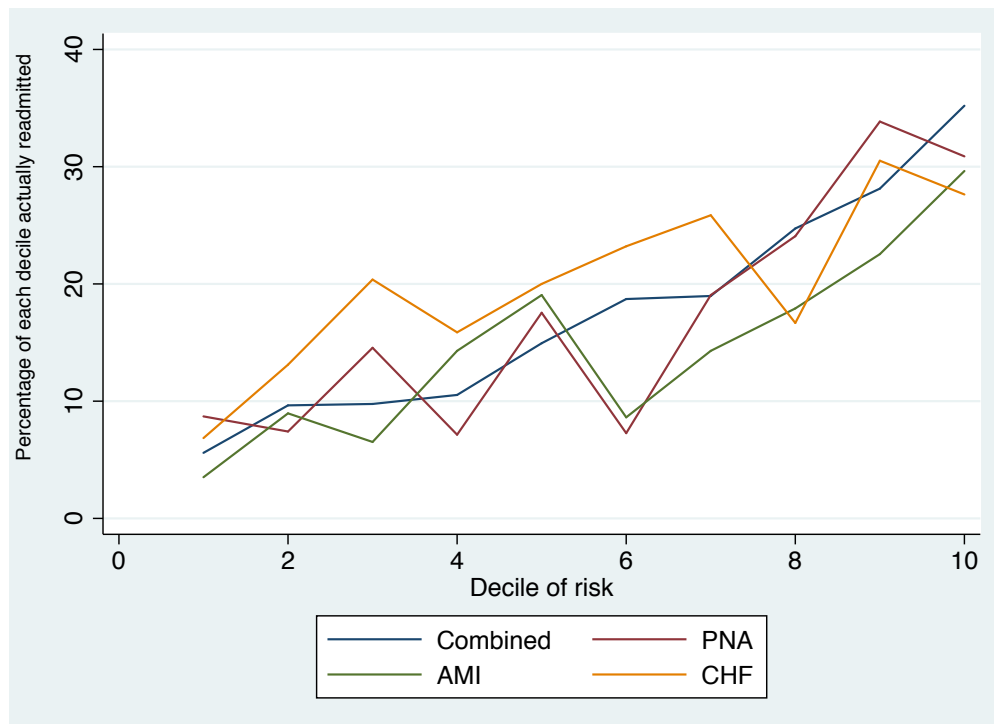

Supplement: MOESM2 [file 9526748]
